# Supplementary material for: Sociodemographic and Health Correlates of Multiple Health Behavior Adherence among Cancer Survivors: A Latent Class Analysis
Source: MDPI journal article supplement (doi:10.3390/nu15102354), 2023-05-17
Supplement: s1 [file s1]

## SUPPLEMENTARY TABLES

**Supplementary Table S1.** Comparison of characteristics among New Jersey cancer survivor cohort members, between non-responders and responders, and those included versus excluded from the analytic sample, N=2,692

| CHARACTERISTICS                                     | Non-Responders<br>N (%) <sup>†</sup> | Responders                     |                                | P-value <sup>††</sup>                        |                                        |
|-----------------------------------------------------|--------------------------------------|--------------------------------|--------------------------------|----------------------------------------------|----------------------------------------|
|                                                     |                                      | Included<br>N (%) <sup>†</sup> | Excluded<br>N (%) <sup>†</sup> | Non-Responders<br>vs. Included<br>Responders | Excluded vs.<br>Included<br>Responders |
| <b>TOTAL</b>                                        | 1830 (100.0)                         | 661 (100.0)                    | 201 (100.0)                    |                                              |                                        |
| <b>SOCIODEMOGRAPHIC</b>                             |                                      |                                |                                |                                              |                                        |
| <b>Sex</b>                                          |                                      |                                |                                | 0.477                                        | 0.614                                  |
| Male                                                | 785 (42.9)                           | 273 (41.3)                     | 79 (39.3)                      |                                              |                                        |
| Female                                              | 1045 (57.1)                          | 388 (58.7)                     | 122 (60.7)                     |                                              |                                        |
| <b>Age (years) at cancer diagnosis</b>              |                                      |                                |                                | 0.054                                        | 0.298                                  |
| 18-24                                               | 17 (0.9)                             | 4 (0.6)                        | 3 (1.5)                        |                                              |                                        |
| 25-44                                               | 161 (8.8)                            | 45 (6.8)                       | 13 (6.5)                       |                                              |                                        |
| 45-64                                               | 953 (52.1)                           | 324 (48.9)                     | 109 (54.2)                     |                                              |                                        |
| ≥65                                                 | 699 (38.2)                           | 289 (43.7)                     | 76 (37.8)                      |                                              |                                        |
| <b>Race</b>                                         |                                      |                                |                                | <0.001                                       | 0.131                                  |
| White                                               | 1341 (73.3)                          | 518 (78.4)                     | 149 (74.1)                     |                                              |                                        |
| Black/African American                              | 330 (18.0)                           | 75 (11.3)                      | 34 (16.9)                      |                                              |                                        |
| Asian/Asian American                                | 158 (8.6)                            | 39 (5.9)                       | 13 (6.5)                       |                                              |                                        |
| Other <sup>a</sup>                                  | 1 (0.1)                              | 29 (4.4)                       | 5 (2.5)                        |                                              |                                        |
| <b>Hispanic ethnicity</b>                           |                                      |                                |                                | 0.383                                        | 0.971                                  |
| Yes                                                 | 126 (6.9)                            | 39 (5.9)                       | 12 (6.0)                       |                                              |                                        |
| No                                                  | 1704 (93.1)                          | 622 (94.1)                     | 189 (94.0)                     |                                              |                                        |
| <b>US-born</b>                                      | NA                                   |                                |                                | NA                                           | 0.341                                  |
| Yes                                                 |                                      | 569 (86.1)                     | 165 (82.1)                     |                                              |                                        |
| No                                                  |                                      | 88 (13.3)                      | 30 (14.9)                      |                                              |                                        |
| Prefer not to answer                                |                                      | 2 (0.3)                        | 2 (1.0)                        |                                              |                                        |
| <b>Marital status</b>                               | NA                                   |                                |                                | NA                                           | 0.585                                  |
| Married                                             |                                      | 452 (68.4)                     | 125 (62.2)                     |                                              |                                        |
| Unmarried                                           |                                      | 119 (18.0)                     | 43 (21.4)                      |                                              |                                        |
| Never married                                       |                                      | 82 (12.4)                      | 27 (13.4)                      |                                              |                                        |
| Don't know/Prefer not to answer                     |                                      | 6 (0.9)                        | 2 (1.0)                        |                                              |                                        |
| <b>Education<sup>b</sup></b>                        | NA                                   |                                |                                | NA                                           | 0.398                                  |
| High school graduate or less                        |                                      | 149 (22.5)                     | 45 (22.4)                      |                                              |                                        |
| Some college/Post high school                       |                                      | 152 (23.0)                     | 53 (26.4)                      |                                              |                                        |
| College graduate                                    |                                      | 201 (30.4)                     | 59 (29.4)                      |                                              |                                        |
| Post college                                        |                                      | 150 (22.7)                     | 38 (18.9)                      |                                              |                                        |
| Other-unspecified/Don't know/Prefer not to answer   |                                      | 5 (0.8)                        | 4 (2.0)                        |                                              |                                        |
| <b>Employment status</b>                            | NA                                   |                                |                                | NA                                           | 0.563                                  |
| Employed/Self-Employed                              |                                      | 284 (43.0)                     | 89 (44.3)                      |                                              |                                        |
| Unemployed/Homemaker/Student/Disabled               |                                      | 84 (12.7)                      | 31 (15.4)                      |                                              |                                        |
| Retired                                             |                                      | 277 (41.9)                     | 75 (37.3)                      |                                              |                                        |
| Other-unspecified/Don't know/Prefer not to answer   |                                      | 4 (0.6)                        | 2 (1.0)                        |                                              |                                        |
| <b>Household income</b>                             | NA                                   |                                |                                | NA                                           | 0.027                                  |
| <\$50,000                                           |                                      | 161 (24.4)                     | 43 (21.4)                      |                                              |                                        |
| \$50,000 - \$89,999                                 |                                      | 151 (22.8)                     | 40 (19.9)                      |                                              |                                        |
| ≥\$90,000                                           |                                      | 211 (31.9)                     | 54 (26.9)                      |                                              |                                        |
| Don't know                                          |                                      | 127 (19.2)                     | 58 (28.9)                      |                                              |                                        |
| <b>Health insurance status at cancer diagnosis</b>  | NA                                   |                                |                                | NA                                           | 0.508                                  |
| Uninsured                                           |                                      | 8 (1.2)                        | 4 (2.0)                        |                                              |                                        |
| Private                                             |                                      | 312 (47.2)                     | 92 (45.8)                      |                                              |                                        |
| Public                                              |                                      | 277 (41.9)                     | 74 (36.8)                      |                                              |                                        |
| Insured, not otherwise specified                    |                                      | 40 (6.1)                       | 17 (8.5)                       |                                              |                                        |
| Don't know                                          |                                      | 24 (3.6)                       | 9 (4.5)                        |                                              |                                        |
| <b>HEALTH HISTORY</b>                               |                                      |                                |                                |                                              |                                        |
| <b>Primary cancer diagnosis</b>                     |                                      |                                |                                | 0.004                                        | 0.200                                  |
| Breast                                              | 350 (19.1)                           | 169 (25.6)                     | 46 (22.9)                      |                                              |                                        |
| Colorectal                                          | 224 (12.2)                           | 66 (10.0)                      | 33 (16.4)                      |                                              |                                        |
| Genitourinary <sup>c</sup>                          | 505 (27.6)                           | 183 (27.7)                     | 51 (25.4)                      |                                              |                                        |
| Gynecologic <sup>d</sup>                            | 239 (13.1)                           | 67 (10.1)                      | 21 (10.4)                      |                                              |                                        |
| Lung                                                | 166 (9.1)                            | 66 (10.0)                      | 20 (10.0)                      |                                              |                                        |
| Malignant skin                                      | 196 (10.7)                           | 66 (10.0)                      | 12 (6.0)                       |                                              |                                        |
| Thyroid                                             | 150 (8.2)                            | 44 (6.7)                       | 18 (9.0)                       |                                              |                                        |
| <b>Cancer stage at diagnosis<sup>e</sup></b>        |                                      |                                |                                | 0.499                                        | 0.037                                  |
| Early stage                                         | 1385 (75.7)                          | 515 (77.9)                     | 140 (69.7)                     |                                              |                                        |
| Late stage                                          | 420 (23.0)                           | 137 (20.7)                     | 59 (29.4)                      |                                              |                                        |
| Unstaged                                            | 25 (1.4)                             | 9 (1.4)                        | 2 (1.0)                        |                                              |                                        |
| <b>Time (years) since cancer diagnosis, mean±SD</b> | NA                                   | 3.2±0.7                        | 3.2±0.8                        | NA                                           | 0.565                                  |
| <b>Cancer treatment type</b>                        |                                      |                                |                                |                                              |                                        |
| Surgery                                             | NA                                   |                                |                                | NA                                           | 0.732                                  |
| Yes                                                 |                                      | 545 (82.5)                     | 168 (83.6)                     |                                              |                                        |

|                                                    |    |            |            |    |       |
|----------------------------------------------------|----|------------|------------|----|-------|
| No                                                 |    | 100 (15.1) | 27 (13.4)  |    |       |
| Do not recall                                      |    | 1 (0.2)    | 0 (0.0)    |    |       |
| Chemotherapy                                       | NA |            |            | NA | 0.061 |
| Yes                                                |    | 179 (27.1) | 71 (35.3)  |    |       |
| No                                                 |    | 418 (63.2) | 110 (54.7) |    |       |
| Do not recall                                      |    | 2 (0.3)    | 1 (0.5)    |    |       |
| Radiotherapy                                       | NA |            |            | NA | 0.831 |
| Yes                                                |    | 258 (39.0) | 81 (40.3)  |    |       |
| No                                                 |    | 359 (54.3) | 108 (53.7) |    |       |
| Do not recall                                      |    | 1 (0.2)    | 0 (0.0)    |    |       |
| <b>No. of cancer treatment modalities received</b> | NA |            |            | NA | 0.301 |
| 0                                                  |    | 27 (4.1)   | 5 (2.5)    |    |       |
| 1                                                  |    | 307 (46.4) | 87 (43.3)  |    |       |
| ≥2                                                 |    | 274 (41.5) | 94 (46.8)  |    |       |
| <b>Cardiometabolic comorbidities<sup>f</sup></b>   | NA |            |            | NA | 0.565 |
| 0                                                  |    | 188 (28.4) | 59 (29.4)  |    |       |
| 1                                                  |    | 174 (26.3) | 45 (22.4)  |    |       |
| ≥2                                                 |    | 285 (43.1) | 91 (45.3)  |    |       |
| <b>Pulmonary comorbidities<sup>g</sup></b>         | NA |            |            | NA | 0.171 |
| 0                                                  |    | 529 (80.0) | 144 (71.6) |    |       |
| ≥1                                                 |    | 120 (18.2) | 43 (21.4)  |    |       |
| <b>Other comorbidities<sup>h</sup></b>             | NA |            |            | NA | 0.782 |
| 0                                                  |    | 446 (67.5) | 128 (63.7) |    |       |
| ≥1                                                 |    | 199 (30.1) | 60 (29.9)  |    |       |

**Abbreviations:** NA, Not Available

<sup>†</sup> Column frequencies and percents for observations may not add up to the total N or 100% if there are missing values for any given variable.

<sup>††</sup> Comparisons for all categorical variables used Chi-Squared tests and comparisons for continuous variables used Analysis of Variance (ANOVA). *P*-values <0.05 are bolded.

<sup>a</sup> Other race includes those self-identifying as other or multiracial.

<sup>b</sup> Post college includes individuals who completed a graduate degree, professional degree, or other certifications/credits following a college degree.

<sup>c</sup> Genitourinary cancers includes bladder and prostate.

<sup>d</sup> Gynecologic cancers include vulvar, endocervical, cervical, endometrial, myometrium, and ovarian.

<sup>e</sup> Cancer stage at diagnosis is divided into early stage, including in situ and localized cases, as well as late stage, including regional and distant cases.

<sup>f</sup> Cardiometabolic comorbidities includes history of diabetes, hypertension, hypercholesterolemia, heart disease, angina, heart attack, congestive heart failure, myocardial infarction, kidney disease, and/or liver disease.

<sup>g</sup> Pulmonary comorbidities includes history of emphysema/chronic obstructive pulmonary disease (COPD), and/or asthma.

<sup>h</sup> Other comorbidities includes history of depression, anxiety disorder, schizophrenia, bipolar disorder, post-traumatic stress disorder (PTSD), peripheral vascular disease, cerebrovascular disease, dementia, connective tissue disease, leukemia, malignant lymphoma, hematological or solid tumor, and/or acquired immunodeficiency syndrome (AIDS).

Supplementary Table S2. Evaluating Class Solutions, N=661

| NUMBER OF CLASSES† | BIC             | VLMR-LRT<br>P-Value | Smallest Class Size, N (%) |
|--------------------|-----------------|---------------------|----------------------------|
| 2                  | 32528.76        | <0.0001             | 296 (44.8%)                |
| <b>3</b>           | <b>32243.71</b> | <b>&lt;0.0001</b>   | <b>55 (8.3%)</b>           |
| 4                  | 32212.44        | 0.7154              | 54 (8.1%)                  |
| 5                  | 32227.26        | 0.2241              | 53 (8.0%)                  |
| 6                  | 32352.24        | 0.5083              | 12 (1.8%)                  |

Abbreviations: BIC, Bayesian information criterion; VLMR LRT, Vuong-Lo-Mendell-Rubin adjusted likelihood ratio test

† Bolded text indicates model met fit criteria.

**Supplementary Table S3.** Latent class analysis item response probabilities and means for each health behavior class, N=661

| BODY MASS INDEX (BMI) AND<br>HEALTH BEHAVIORS | HEALTH BEHAVIOR CLASS† |                         |                    |
|-----------------------------------------------|------------------------|-------------------------|--------------------|
|                                               | High-risk lifestyle    | Moderate-risk lifestyle | Low-risk lifestyle |
| <b>LATENT CLASS MEMBERSHIP N (%)</b>          | 55 (8.3)               | 344 (52.0)              | 262 (39.6)         |
| <b>BMI (kg/m<sup>2</sup>)<sup>a</sup></b>     |                        |                         |                    |
| <25.00                                        | 0.20                   | 0.27                    | 0.35               |
| 25.00 – 29.99                                 | 0.35                   | 0.35                    | 0.38               |
| ≥30.00                                        | 0.45                   | 0.39                    | 0.27               |
| <b>Physical activity<sup>a</sup></b>          |                        |                         |                    |
| Insufficiently active/sedentary (LSI<14)      | 0.36                   | 0.40                    | 0.22               |
| Moderately active (LSI=14-23)                 | 0.31                   | 0.21                    | 0.15               |
| Active (LSI≥24)                               | 0.34                   | 0.39                    | 0.63               |
| <b>Smoking status<sup>a</sup></b>             |                        |                         |                    |
| Never smoker                                  | 0.30                   | 0.49                    | 0.59               |
| Former smoker                                 | 0.46                   | 0.40                    | 0.40               |
| Current smoker                                | 0.24                   | 0.10                    | 0.02*              |
| <b>Alcohol consumption<sup>a</sup></b>        |                        |                         |                    |
| 0 drinks/day                                  | 0.60                   | 0.37                    | 0.31               |
| 0 < drinks/day ≤ 1                            | 0.20                   | 0.30                    | 0.32               |
| 1 < drinks/day ≤ 2                            | 0.14                   | 0.21                    | 0.27               |
| >2 drinks/day                                 | 0.07*                  | 0.13                    | 0.11               |
| <b>Healthy diet intake<sup>b</sup></b>        |                        |                         |                    |
| More fruit                                    | 3.27                   | 2.98                    | 5.06               |
| More vegetables                               | 3.72                   | 3.48                    | 5.32               |
| More whole grains                             | 3.54                   | 2.86                    | 4.17               |
| Less sugar                                    | 2.27                   | 5.55                    | 5.75               |
| Less red meat                                 | 3.70                   | 4.34                    | 4.63               |
| Less processed meat                           | 4.11                   | 4.65                    | 5.04               |
| Less fast foods                               | 4.50                   | 4.93                    | 5.29               |
| <b>Sun safety<sup>b</sup></b>                 |                        |                         |                    |
| Wearing sunscreen                             | 2.56                   | 2.81                    | 3.38               |
| Wearing shirt with sleeves covering shoulders | 3.79                   | 3.78                    | 3.84               |
| Wearing a hat                                 | 3.18                   | 2.83                    | 3.15               |
| Staying in the shade or under an umbrella     | 3.23                   | 3.43                    | 3.36               |
| Wearing sunglasses                            | 3.70                   | 3.73                    | 4.15               |
| <b>Last physician visit<sup>a</sup></b>       |                        |                         |                    |
| <4 weeks ago                                  | 0.29                   | 0.22                    | 0.23               |
| 1-3 months ago                                | 0.31                   | 0.29                    | 0.33               |
| 4-6 months ago                                | 0.20                   | 0.27                    | 0.27               |
| 7-12 months ago                               | 0.07                   | 0.14                    | 0.13               |
| >2 years ago                                  | 0.12                   | 0.08                    | 0.04               |

† Latent class analysis identified a 3-class model as the best fit and most interpretable model for describing distinct health behavior patterns among cancer survivors in this cohort. Item response probabilities and means are reported for each latent or health behavior class. All probabilities and means were significantly different from zero except for those marked with an asterisk (\*).

<sup>a</sup> Item response probabilities for categorical health behavior items (BMI, physical activity, smoking status, alcohol consumption, and last physician visit)

<sup>b</sup> Item response means for continuous health behavior items (healthy diet intake and sun safety)
